# Supplementary material
Source: PubMed Central journal article supplement (PMC8386185)
Supplement: NIHMS1734316-supplement-Supp_Figure_1.pdf [file NIHMS1734316-supplement-Supp_Figure_1.pdf]

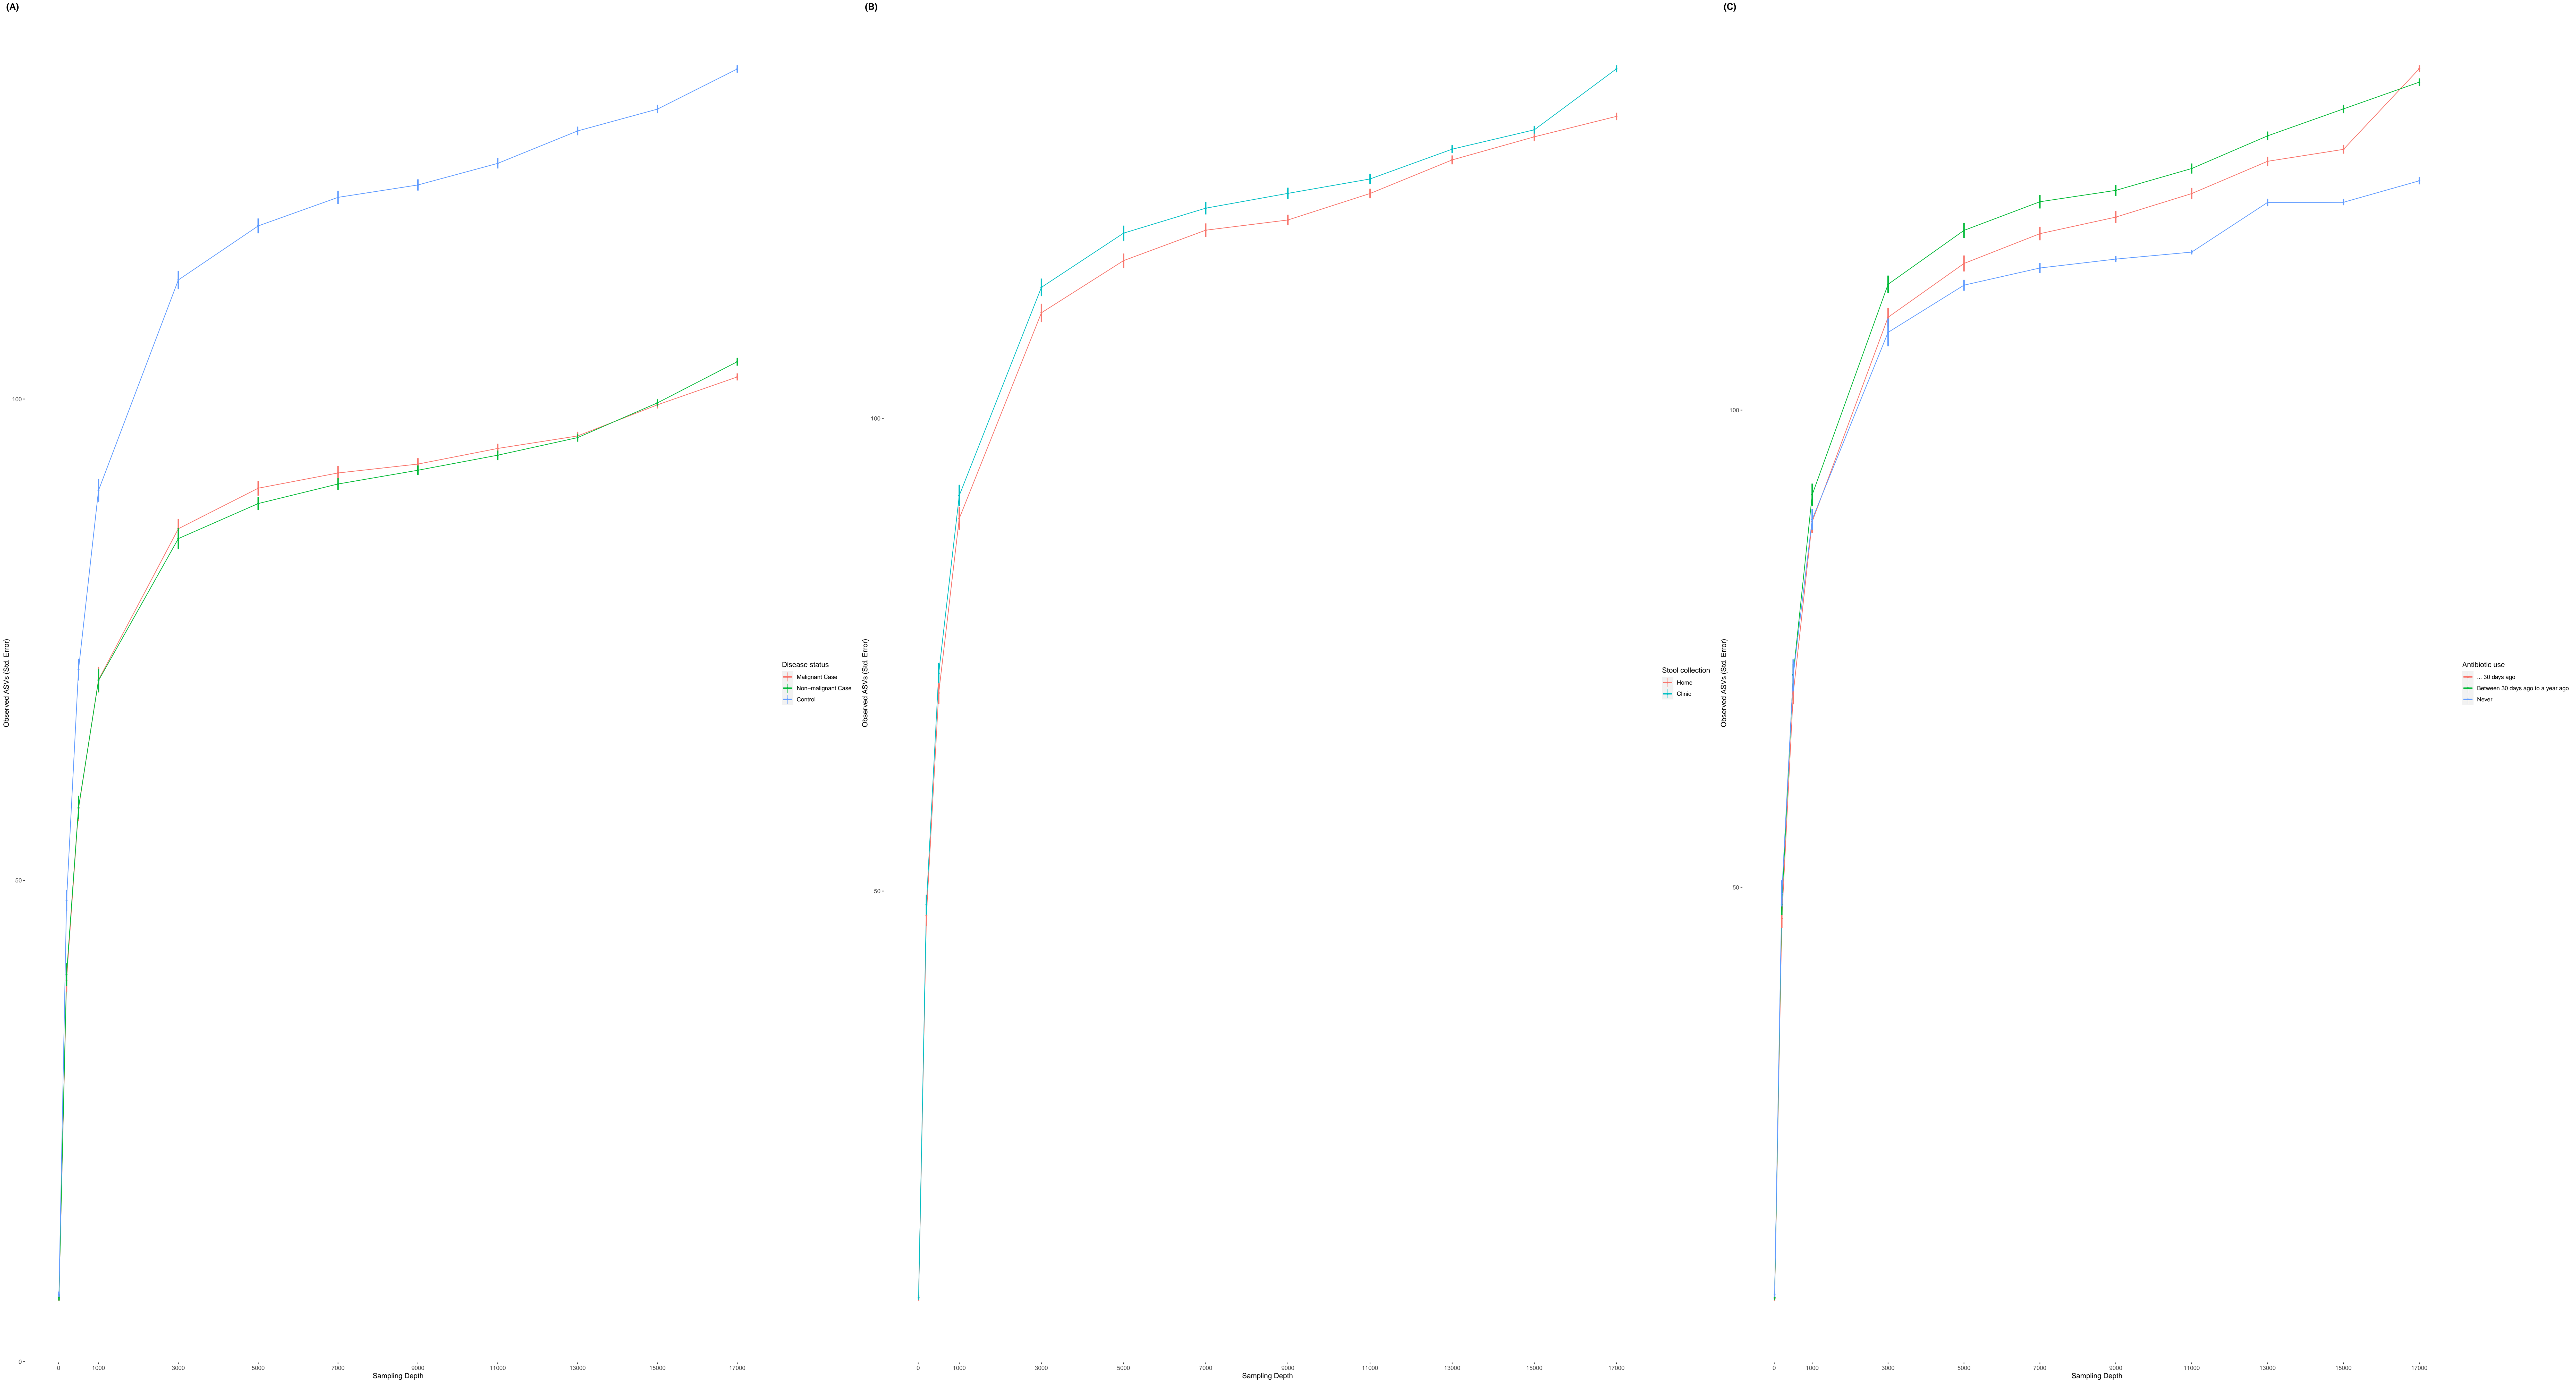

Supplemental Figure 1. Rarefaction curves for observed amplicon sequence variants in fecal samples collected in the Ghana Breast Health study by (A) disease status, (B) stool collection location, and (C) history of antibiotic use (N=102 non-malignant breast disease cases, 379 malignant cases, and 414 controls).
