# Supplementary material
Source: PubMed Central journal article supplement (PMC8386185)
Supplement: NIHMS1734316-supplement-Supp_Figure_2.pdf [file NIHMS1734316-supplement-Supp_Figure_2.pdf]

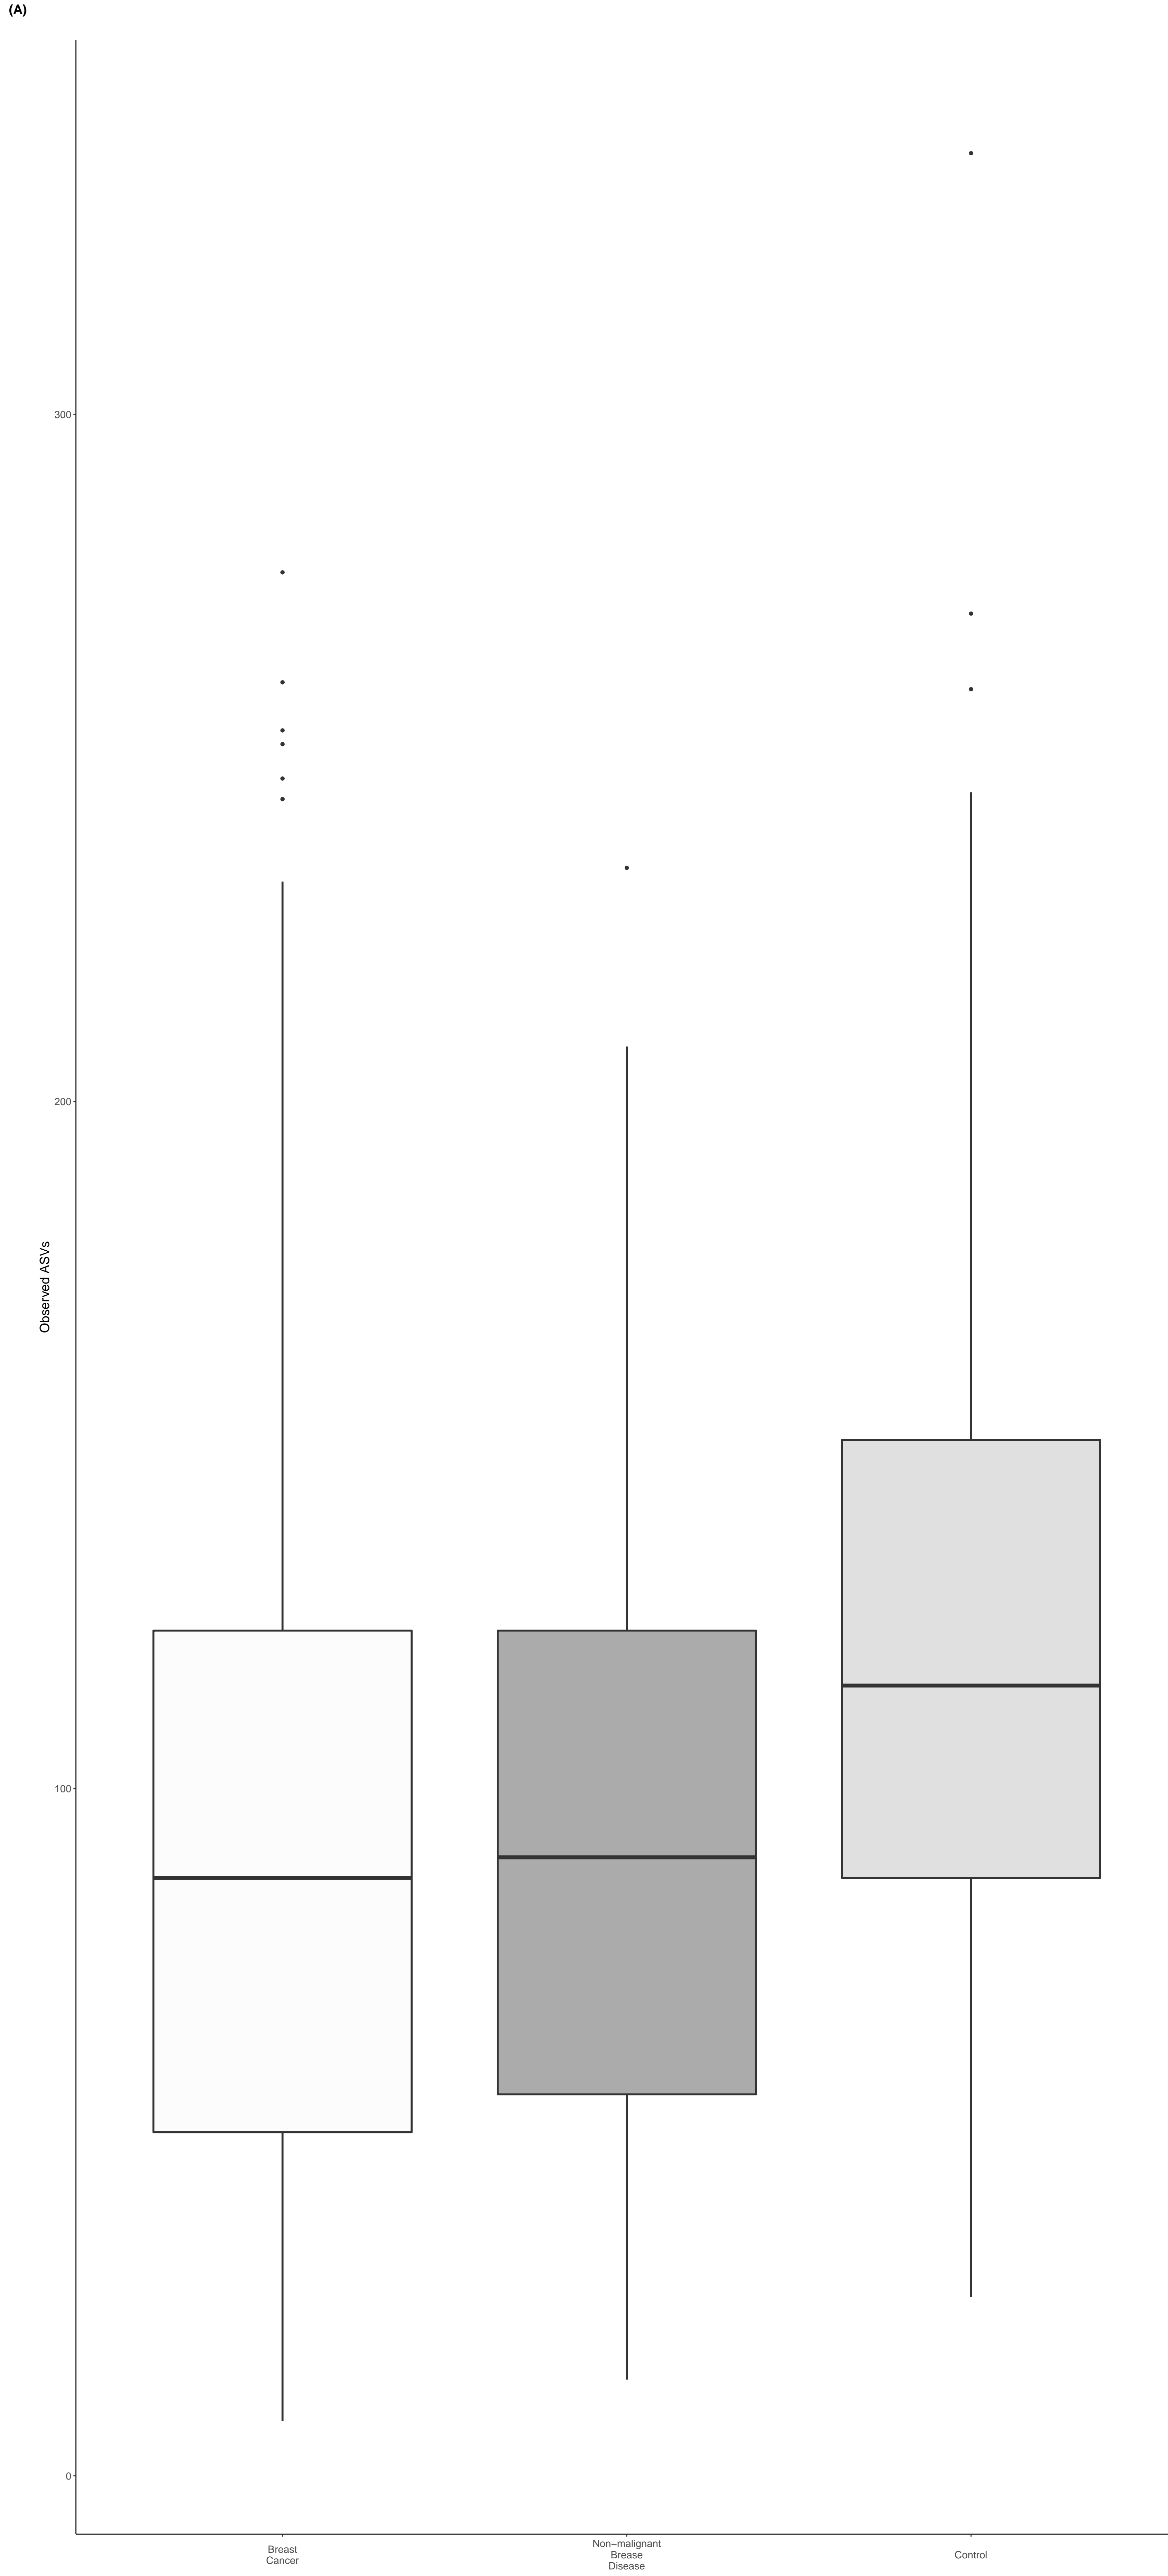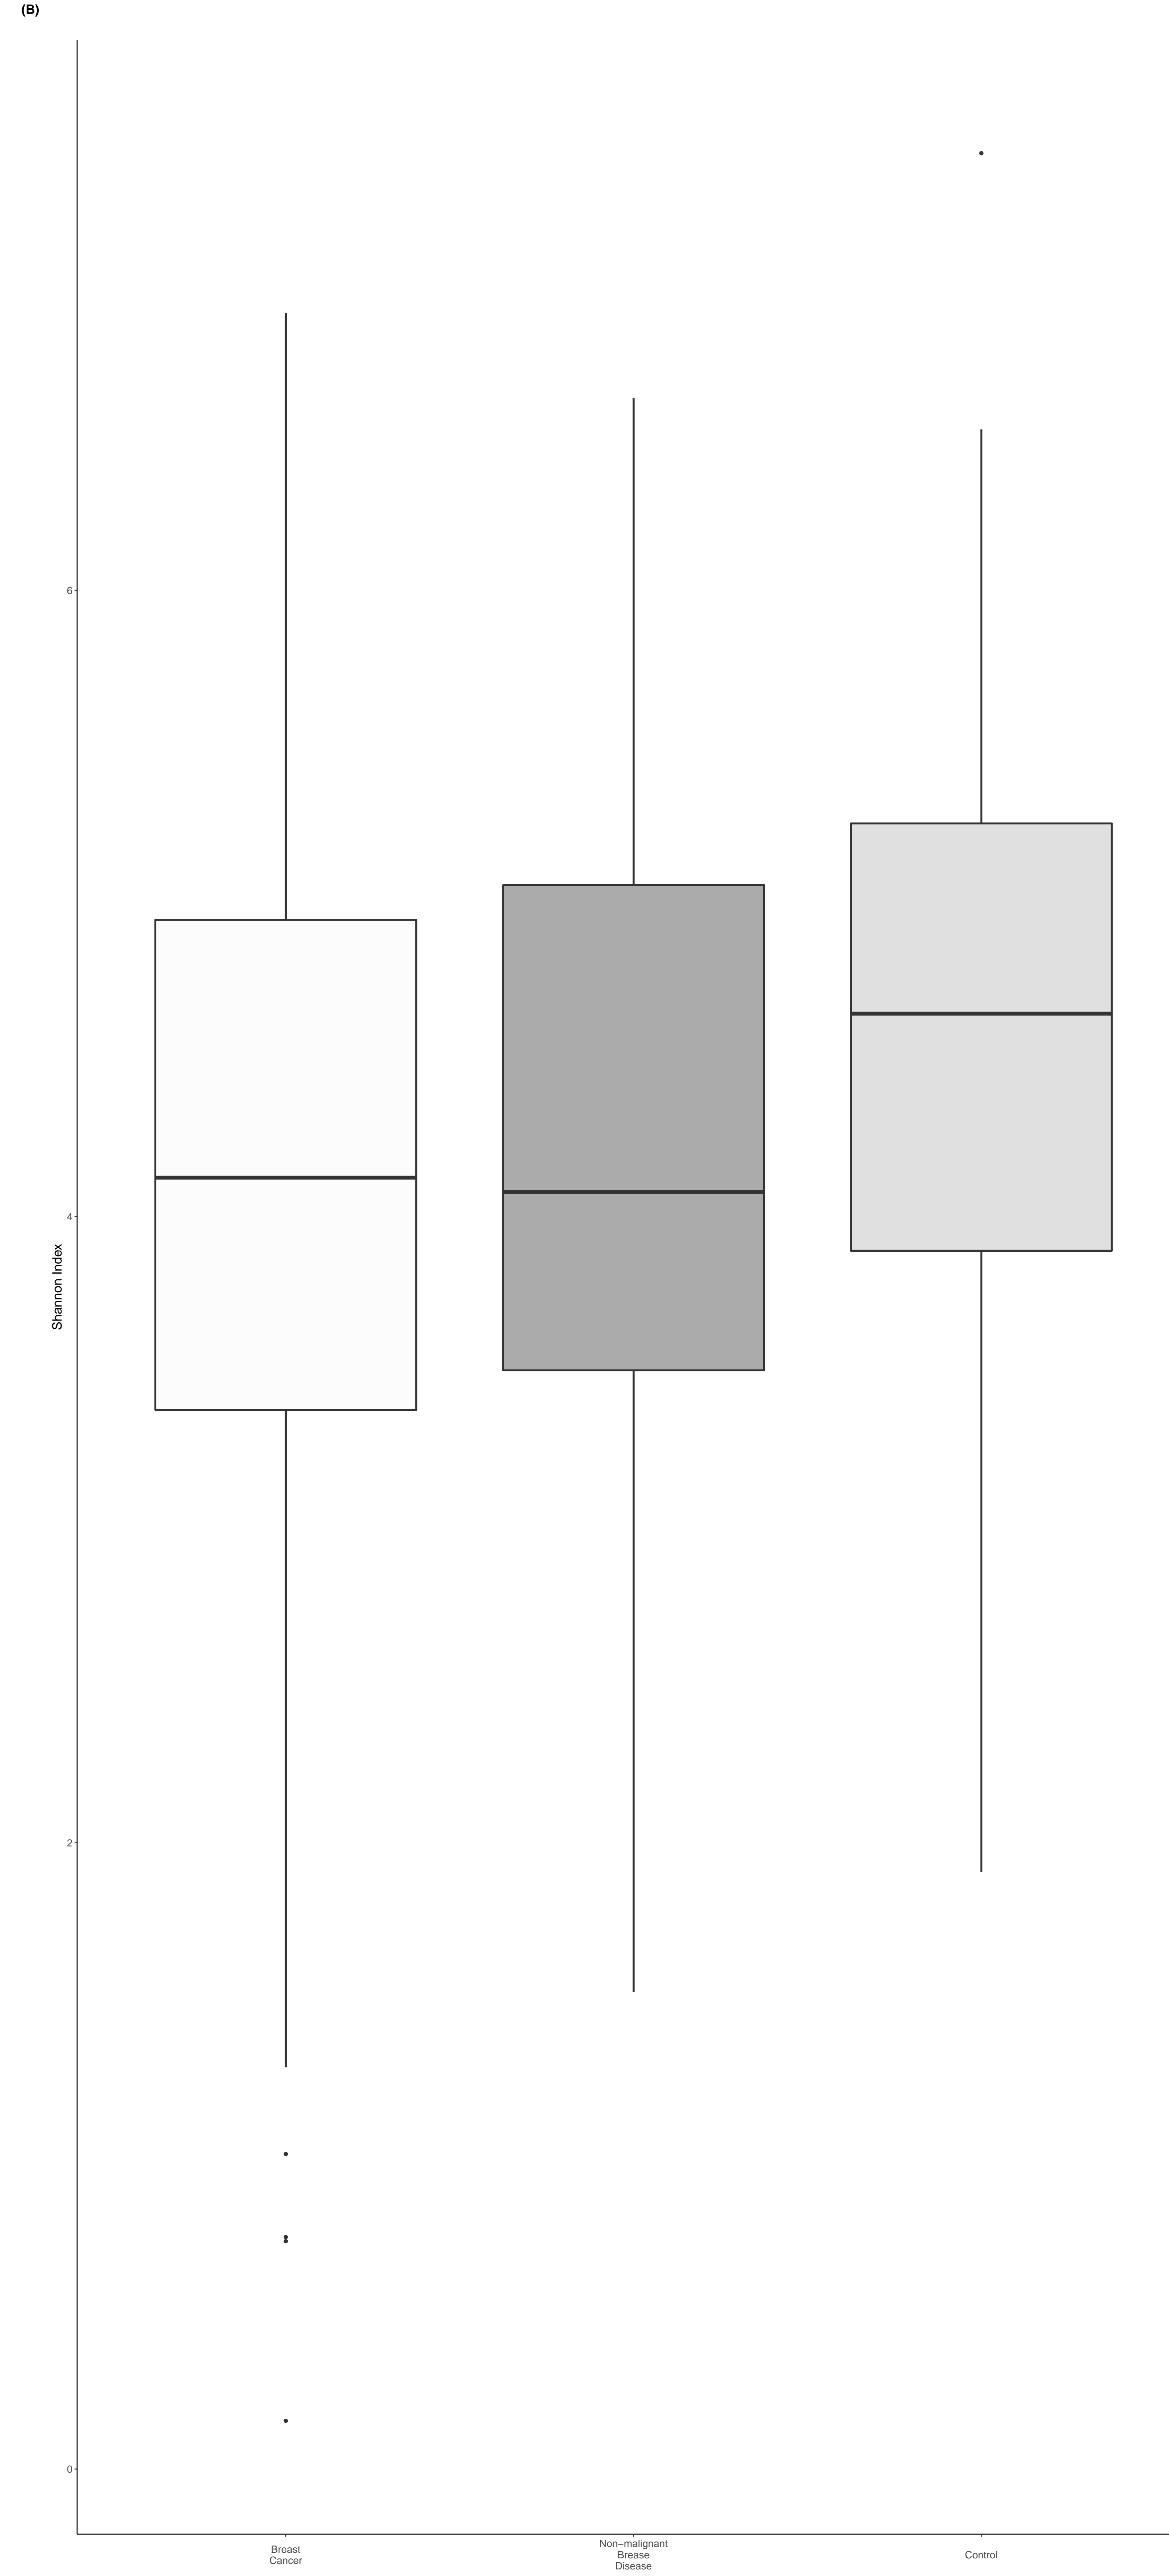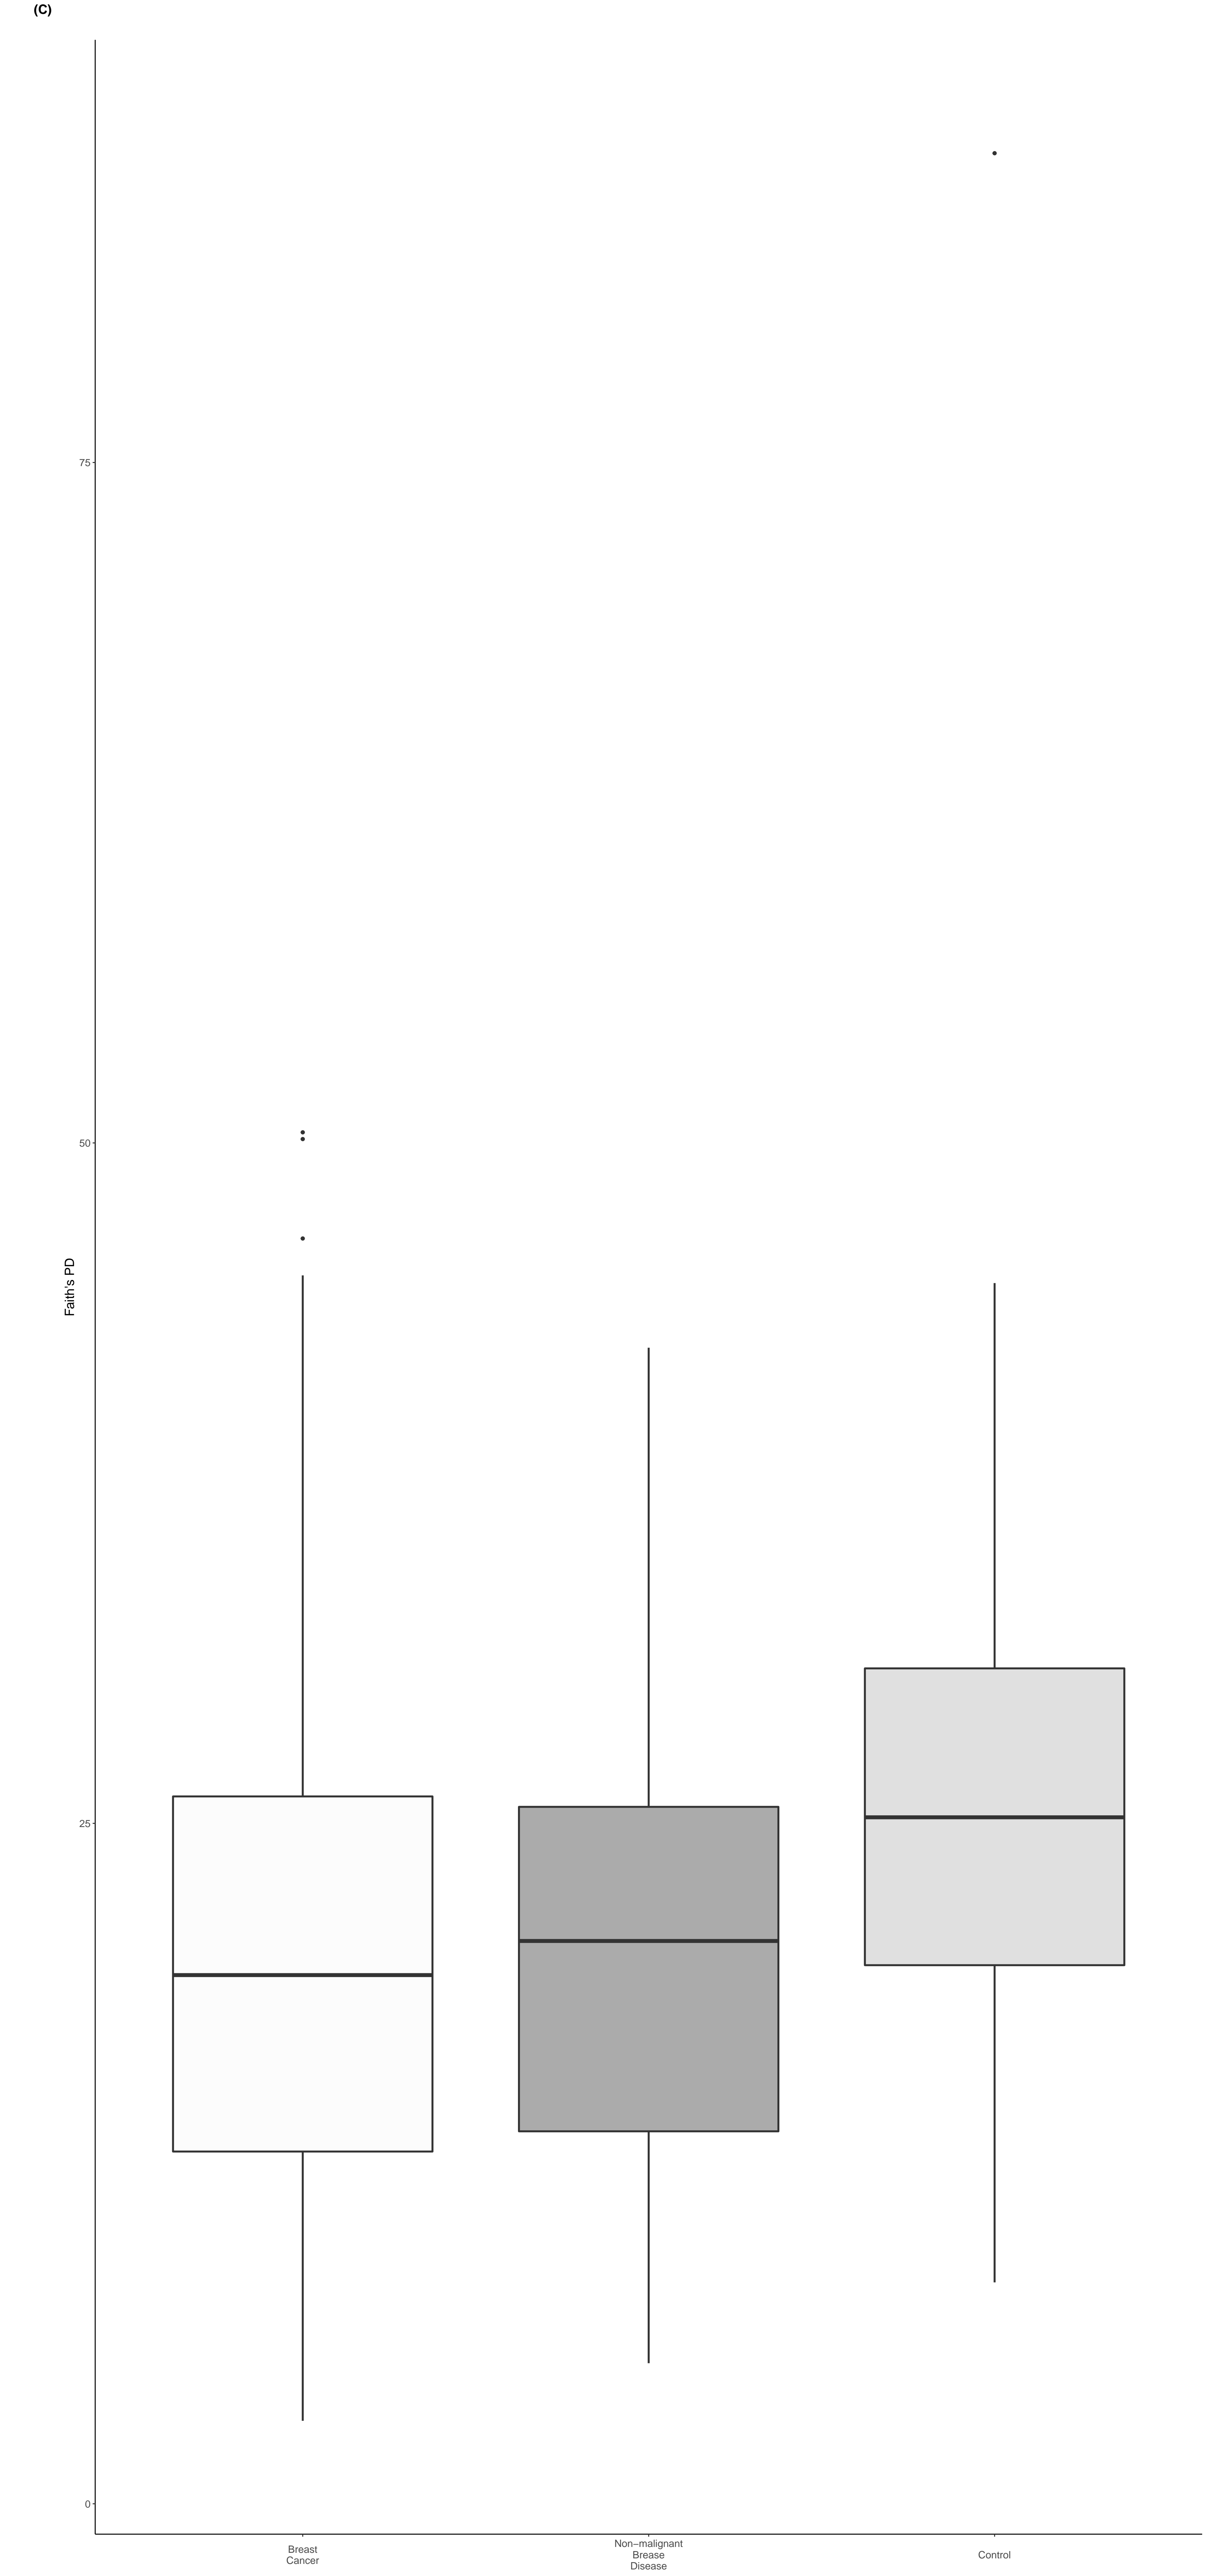

Supplemental Figure 2. Boxplots of alpha diversity by disease status for (A) observed amplicon sequence variants, (B) the Shannon index, and (C) Faith's phylogenetic diversity in the Ghana Breast Health study (N=102 non-malignant breast disease cases, 379 malignant cases, and 414 controls)
